# Supplementary material
Source: PubMed Central journal article supplement (PMC8533028)

# Appendix Exhibit A1

Hurricane Katrina  
August 29, 2005

## Opening Doors Study

## Resilience in Survivors of Katrina Project

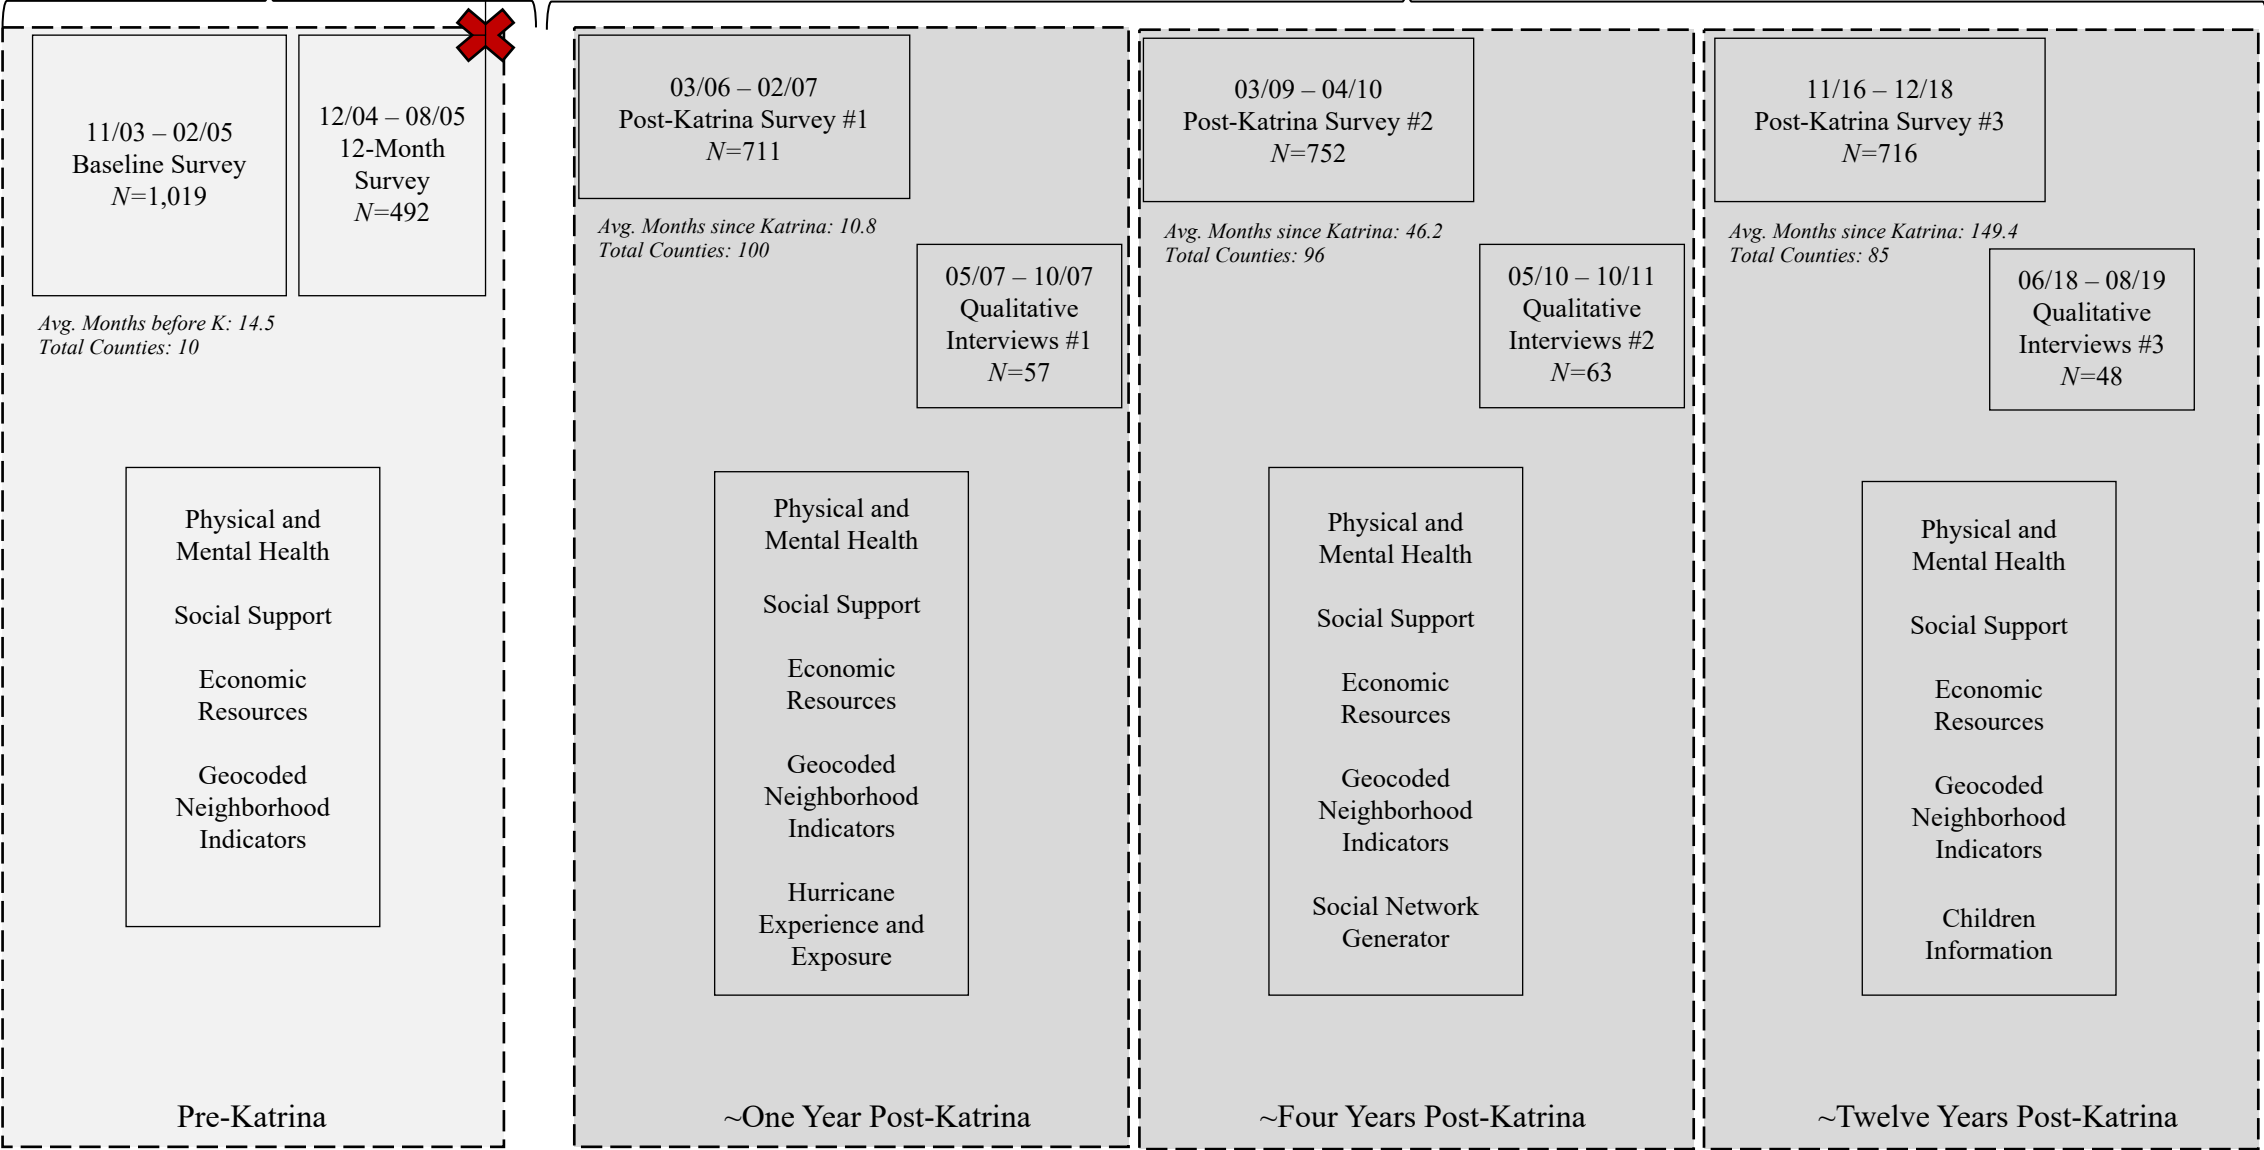

Supplement: NIHMS1744835-supplement-online_appendix.pdf [file NIHMS1744835-supplement-online_appendix.pdf]
